# Supplementary material for: Comparison of frozen-density embedding and discrete reaction field solvent models for molecular properties
Source: Royal Society of Chemistry journal article supplement (doi:10.1039/b601997h), 2006-01-01
Supplement: b601997h.pdf [file b601997h.pdf]

# Comparison of Frozen-Density Embedding and Discrete Reaction Field Solvent Models for Molecular Properties

## Supplementary Material

Christoph R. Jacob<sup>a,1</sup>, Johannes Neugebauer<sup>a,2</sup>, Lasse Jensen<sup>b,3</sup>,  
and Lucas Visscher<sup>a,4</sup>

<sup>a</sup>Vrije Universiteit Amsterdam,  
Department of Theoretical Chemistry, Faculty of Sciences,  
De Boelelaan 1083, 1081 HV Amsterdam, The Netherlands

<sup>b</sup>Northwestern University, Department of Chemistry,  
2145 Sheridan Road, Evanston, IL 60208-3113, USA

---

<sup>1</sup>E-Mail: jacob@few.vu.nl

<sup>2</sup>E-Mail: jneugeb@chem.vu.nl

<sup>3</sup>E-Mail: l.jensen@chem.northwestern.edu

<sup>4</sup>E-Mail: visscher@chem.vu.nl

In this supplementary material the coordinates of the water cluster used in our calculations are given. These coordinates are also given in XYZ format in a separate file.

Table I: Structure of the water cluster used in the calculations. Water molecule no. 1 is considered as the solute, all other water molecules form the solvent shell. All coordinates are given in atomic units.

| no.               | atom | $x$        | $y$        | $z$        |
|-------------------|------|------------|------------|------------|
| H2O 1<br>(solute) | O    | 0.000000   | 0.000000   | 0.000000   |
|                   | H    | -1.430143  | 0.000000   | 1.107393   |
|                   | H    | 1.430143   | 0.000000   | 1.107393   |
| H2O 2             | O    | -11.380487 | -11.810553 | -4.515226  |
|                   | H    | -13.104750 | -11.837668 | -3.969549  |
|                   | H    | -10.510887 | -12.853302 | -3.320214  |
| H2O 3             | O    | -1.116350  | 9.119186   | -3.230948  |
|                   | H    | -2.822701  | 9.717028   | -3.180632  |
|                   | H    | -0.123780  | 10.538183  | -2.708611  |
| H2O 4             | O    | 4.469332   | -0.503788  | 2.210877   |
|                   | H    | 4.273576   | -2.085090  | 3.066884   |
|                   | H    | 5.919073   | -0.737018  | 1.154734   |
| H2O 5             | O    | -16.969012 | -3.658353  | -10.785713 |
|                   | H    | -15.708245 | -4.239962  | -9.626497  |
|                   | H    | -16.478149 | -4.360802  | -12.378572 |
| H2O 6             | O    | -10.765608 | -4.163577  | 0.518032   |
|                   | H    | -9.161169  | -3.986232  | -0.298001  |
|                   | H    | -11.974842 | -3.796368  | -0.775990  |
| H2O 7             | O    | -6.554233  | -9.202975  | -11.231254 |
|                   | H    | -8.153008  | -9.653539  | -10.515367 |
|                   | H    | -6.907141  | -7.749987  | -12.249029 |
| H2O 8             | O    | -14.167136 | -6.558132  | -6.629574  |
|                   | H    | -13.746900 | -8.312032  | -6.766757  |
|                   | H    | -15.432937 | -6.495366  | -5.339073  |
| H2O 9             | O    | -1.012338  | -6.537375  | -20.632283 |
|                   | H    | 0.513578   | -7.016737  | -19.787667 |
|                   | H    | -2.258470  | -6.487215  | -19.322236 |
| H2O 10            | O    | -7.973723  | 4.333816   | 8.858697   |
|                   | H    | -7.392102  | 2.717043   | 9.423808   |
|                   | H    | -7.341341  | 4.477733   | 7.170217   |
| H2O 11            | O    | 1.687680   | -11.293163 | -2.876367  |
|                   | H    | 1.520004   | -11.659990 | -4.639576  |
|                   | H    | 0.925644   | -9.664791  | -2.678150  |
| H2O 12            | O    | 1.091846   | -1.698117  | -18.817171 |
|                   | H    | 2.072153   | -2.343258  | -20.193534 |
|                   | H    | 0.133987   | -3.119028  | -18.238291 |
| H2O 13            | O    | -13.852587 | -1.513172  | -3.428477  |
|                   | H    | -13.345617 | -1.909473  | -5.118894  |
|                   | H    | -15.318869 | -2.533446  | -3.144505  |
| H2O 14            | O    | 5.289604   | -6.812668  | -13.105858 |
|                   | H    | 7.017082   | -6.621785  | -12.604893 |
|                   | H    | 4.346712   | -5.977920  | -11.807499 |
| H2O 15            | O    | -11.474072 | -10.907083 | -9.440850  |
|                   | H    | -11.216113 | -12.454404 | -10.341316 |

continued on following page

Table I: Structure of the water cluster used in the calculations.  
(continued)

| no.    | atom | $x$        | $y$        | $z$        |
|--------|------|------------|------------|------------|
|        | H    | -11.176343 | -11.335919 | -7.709076  |
| H20 16 | O    | -1.645921  | -11.435233 | 1.480980   |
|        | H    | -0.305579  | -10.473635 | 0.739090   |
|        | H    | -1.729938  | -12.940685 | 0.481912   |
| H20 17 | O    | -7.324684  | -5.018181  | 4.387749   |
|        | H    | -8.818370  | -4.730291  | 3.409176   |
|        | H    | -7.759228  | -6.389106  | 5.484707   |
| H20 18 | O    | 5.208797   | -6.838506  | 3.691461   |
|        | H    | 5.265790   | -6.685119  | 1.890125   |
|        | H    | 6.391621   | -5.607189  | 4.288426   |
| H20 19 | O    | -1.248954  | -6.977509  | -2.931094  |
|        | H    | -2.378328  | -6.595798  | -1.570801  |
|        | H    | -0.212881  | -5.503091  | -3.086752  |
| H20 20 | O    | 6.737491   | -0.260656  | -6.588501  |
|        | H    | 6.563017   | -2.046802  | -6.813946  |
|        | H    | 8.299250   | 0.148296   | -7.404129  |
| H20 21 | O    | 5.306243   | -5.543095  | -6.435993  |
|        | H    | 3.812800   | -6.090722  | -7.296991  |
|        | H    | 6.651899   | -6.435270  | -7.251355  |
| H20 22 | O    | -5.722143  | -7.593764  | -5.609892  |
|        | H    | -5.637663  | -7.499595  | -7.414214  |
|        | H    | -3.997351  | -7.514256  | -5.071046  |
| H20 23 | O    | -4.964121  | 4.323349   | -3.258997  |
|        | H    | -6.269194  | 5.559506   | -3.058294  |
|        | H    | -3.431140  | 5.226291   | -2.933039  |
| H20 24 | O    | -10.942326 | 0.554379   | -13.182449 |
|        | H    | -9.993651  | 2.083341   | -13.366497 |
|        | H    | -12.257983 | 0.686448   | -14.416622 |
| H20 25 | O    | -9.296367  | 5.399236   | -12.624634 |
|        | H    | -7.787172  | 5.399698   | -11.627680 |
|        | H    | -8.713677  | 5.570734   | -14.328348 |
| H20 26 | O    | 2.976413   | -12.445061 | 3.626050   |
|        | H    | 3.661096   | -10.770921 | 3.633077   |
|        | H    | 1.221490   | -12.215013 | 3.253348   |
| H20 27 | O    | -7.520338  | -2.709606  | -16.431855 |
|        | H    | -8.541435  | -2.016582  | -15.109485 |
|        | H    | -8.126184  | -1.911147  | -17.937510 |
| H20 28 | O    | -1.697017  | -2.043822  | -8.206757  |
|        | H    | -1.169362  | -0.432664  | -8.837102  |
|        | H    | -0.636639  | -2.337826  | -6.771227  |
| H20 29 | O    | 5.301322   | -9.560473  | 8.452236   |
|        | H    | 5.273862   | -8.617631  | 6.908901   |
|        | H    | 4.550179   | -8.455453  | 9.671374   |
| H20 30 | O    | 5.994893   | -5.843987  | -1.278668  |
|        | H    | 6.104997   | -5.948817  | -3.081019  |
|        | H    | 7.022977   | -4.420655  | -0.844212  |
| H20 31 | O    | -8.499334  | 6.307303   | 1.262069   |
|        | H    | -9.264138  | 5.216347   | 0.038764   |
|        | H    | -9.841307  | 6.720288   | 2.402303   |

continued on following page

Table I: Structure of the water cluster used in the calculations.  
(continued)

| no.    | atom | $x$        | $y$        | $z$        |
|--------|------|------------|------------|------------|
| H20 32 | O    | 1.422658   | 7.151005   | -6.702457  |
|        | H    | 0.491241   | 7.745308   | -5.270377  |
|        | H    | 2.872433   | 6.334866   | -5.992772  |
| H20 33 | O    | 1.165723   | -15.863273 | -8.030117  |
|        | H    | -0.439795  | -16.566458 | -8.476687  |
|        | H    | 1.270245   | -14.330699 | -8.985039  |
| H20 34 | O    | -1.891948  | -10.635521 | -8.584698  |
|        | H    | -2.788156  | -10.717519 | -10.153669 |
|        | H    | -2.907785  | -11.590556 | -7.432498  |
| H20 35 | O    | 1.303221   | -6.546667  | -9.290668  |
|        | H    | 0.041454   | -7.803822  | -8.975882  |
|        | H    | 0.439986   | -4.972917  | -9.067680  |
| H20 36 | O    | -4.108004  | -6.593872  | -16.433977 |
|        | H    | -4.900894  | -8.114135  | -17.009918 |
|        | H    | -5.447950  | -5.380612  | -16.369714 |
| H20 37 | O    | -5.920829  | -3.031071  | -2.510728  |
|        | H    | -5.780713  | -4.560880  | -3.465523  |
|        | H    | -6.212676  | -1.747908  | -3.751655  |
| H20 38 | O    | -5.199834  | -12.826876 | -4.968785  |
|        | H    | -6.704703  | -13.433268 | -5.768310  |
|        | H    | -5.429549  | -11.035455 | -4.870672  |
| H20 39 | O    | -4.897867  | 5.501788   | -16.517711 |
|        | H    | -4.966749  | 7.305860   | -16.407434 |
|        | H    | -3.227631  | 5.077951   | -15.967930 |
| H20 40 | O    | -17.578987 | -4.993467  | -2.976815  |
|        | H    | -18.763866 | -3.841942  | -2.240855  |
|        | H    | -17.398663 | -6.306119  | -1.745551  |
| H20 41 | O    | -3.507768  | -17.323802 | -10.104425 |
|        | H    | -4.401931  | -18.633085 | -10.974960 |
|        | H    | -4.539511  | -16.949532 | -8.666715  |
| H20 42 | O    | -10.819116 | -4.666408  | -11.144871 |
|        | H    | -11.621851 | -4.882964  | -9.538538  |
|        | H    | -10.609156 | -2.877364  | -11.308649 |
| H20 43 | O    | -6.392055  | 0.017935   | -6.732485  |
|        | H    | -5.821253  | 1.226250   | -5.513574  |
|        | H    | -4.874902  | -0.728020  | -7.375433  |
| H20 44 | O    | -11.305055 | 0.463797   | -8.250657  |
|        | H    | -9.642271  | 0.806743   | -7.626859  |
|        | H    | -11.198970 | 0.791091   | -10.026384 |
| H20 45 | O    | 9.003924   | 1.260468   | -13.978052 |
|        | H    | 8.872950   | 1.029481   | -12.188897 |
|        | H    | 7.294256   | 1.453383   | -14.536089 |
| H20 46 | O    | 1.143175   | -2.768263  | -3.930866  |
|        | H    | 2.949704   | -2.781020  | -3.842132  |
|        | H    | 0.628498   | -1.739396  | -2.535113  |
| H20 47 | O    | -5.215466  | -0.716794  | 1.975589   |
|        | H    | -5.881933  | -1.357545  | 0.420969   |
|        | H    | -5.825941  | -1.861509  | 3.235957   |
| H20 48 | O    | -5.420316  | 3.662969   | 4.478819   |

continued on following page

Table I: Structure of the water cluster used in the calculations.  
(continued)

| no.    | atom | $x$        | $y$        | $z$        |
|--------|------|------------|------------|------------|
|        | H    | -6.477342  | 4.753711   | 3.496698   |
|        | H    | -5.283871  | 2.154314   | 3.490422   |
| H20 49 | O    | -10.890417 | 3.434227   | -2.589015  |
|        | H    | -11.048283 | 1.963519   | -3.630016  |
|        | H    | -12.483474 | 3.562677   | -1.742108  |
| H20 50 | O    | -5.775320  | 11.853646  | -3.101847  |
|        | H    | -7.420972  | 11.268971  | -2.631136  |
|        | H    | -5.594935  | 13.436445  | -2.245230  |
| H20 51 | O    | 4.649786   | 3.675426   | -3.783517  |
|        | H    | 5.304643   | 2.161377   | -4.525409  |
|        | H    | 3.400168   | 3.100409   | -2.609040  |
| H20 52 | O    | -1.567977  | 3.410131   | -9.464615  |
|        | H    | -0.626486  | 4.692285   | -8.603650  |
|        | H    | -1.229765  | 3.700123   | -11.217641 |
| H20 53 | O    | -5.851145  | 5.947899   | -8.752976  |
|        | H    | -4.364364  | 4.937406   | -8.952908  |
|        | H    | -5.233574  | 7.643906   | -8.635724  |
| H20 54 | O    | -5.554133  | -7.923600  | 0.255548   |
|        | H    | -4.383273  | -9.288435  | 0.450223   |
|        | H    | -6.017695  | -7.479952  | 1.946662   |
| H20 55 | O    | -10.801479 | 4.924607   | -18.428256 |
|        | H    | -9.467731  | 4.114450   | -19.342775 |
|        | H    | -12.082856 | 3.656860   | -18.278348 |
| H20 56 | O    | 11.847656  | 6.046520   | -5.603357  |
|        | H    | 12.238224  | 7.542818   | -4.665204  |
|        | H    | 10.145164  | 6.293731   | -6.161919  |
| H20 57 | O    | 1.386876   | -3.561002  | 5.147103   |
|        | H    | 2.355859   | -2.845564  | 6.496475   |
|        | H    | 2.259942   | -5.087064  | 4.722284   |
| H20 58 | O    | 9.401772   | -2.164511  | 0.065934   |
|        | H    | 9.991916   | -0.603357  | -0.631284  |
|        | H    | 10.908492  | -3.099727  | 0.421948   |
| H20 59 | O    | -3.306352  | -3.510754  | 7.521433   |
|        | H    | -1.821452  | -3.757766  | 6.518615   |
|        | H    | -4.649775  | -4.184206  | 6.514825   |
| H20 60 | O    | -3.837669  | 11.000091  | -8.559487  |
|        | H    | -3.743740  | 10.833060  | -6.760914  |
|        | H    | -4.874396  | 12.458209  | -8.825323  |
| H20 61 | O    | -8.922772  | 7.515155   | -5.130050  |
|        | H    | -7.642411  | 6.796305   | -6.186229  |
|        | H    | -9.987510  | 6.119163   | -4.695168  |
| H20 62 | O    | -0.328799  | 4.856437   | -14.284939 |
|        | H    | -0.201219  | 6.618156   | -13.895513 |
|        | H    | 1.105589   | 4.519547   | -15.334042 |
| H20 63 | O    | -2.881192  | -21.161439 | -13.737737 |
|        | H    | -1.096481  | -20.881550 | -13.827486 |
|        | H    | -3.127888  | -22.768721 | -14.529801 |
| H20 64 | O    | 4.084301   | -17.323502 | 4.721371   |
|        | H    | 4.024131   | -15.518279 | 4.625782   |

continued on following page

Table I: Structure of the water cluster used in the calculations.  
(continued)

| no.    | atom | $x$        | $y$        | $z$        |
|--------|------|------------|------------|------------|
|        | H    | 2.369362   | -17.818926 | 5.013133   |
| H20 65 | O    | -12.718566 | 7.205589   | 4.460795   |
|        | H    | -14.459983 | 7.694157   | 4.479549   |
|        | H    | -11.909749 | 8.368875   | 5.585145   |
| H20 66 | O    | 3.646309   | -5.777295  | 11.936169  |
|        | H    | 4.697699   | -5.280697  | 13.321648  |
|        | H    | 1.980190   | -5.852159  | 12.636189  |
| H20 67 | O    | -11.582902 | -8.009770  | -14.717441 |
|        | H    | -11.154532 | -6.961783  | -13.306835 |
|        | H    | -13.310143 | -7.607206  | -15.072634 |
| H20 68 | O    | -22.691319 | -4.602067  | -11.338511 |
|        | H    | -22.222728 | -6.122623  | -12.198693 |
|        | H    | -21.135451 | -3.704676  | -11.125083 |
| H20 69 | O    | 5.964801   | 4.513703   | 3.703328   |
|        | H    | 5.242917   | 3.066218   | 2.893848   |
|        | H    | 4.736155   | 5.002020   | 4.937653   |
| H20 70 | O    | 4.568726   | 15.366721  | -5.272902  |
|        | H    | 6.232086   | 14.724941  | -5.577752  |
|        | H    | 4.568871   | 17.006212  | -6.036872  |
| H20 71 | O    | -19.420245 | 0.101012   | -13.928108 |
|        | H    | -18.314059 | -1.071686  | -13.107913 |
|        | H    | -20.713212 | 0.433367   | -12.707714 |
| H20 72 | O    | 4.028370   | -8.180716  | -24.036693 |
|        | H    | 5.655114   | -8.965853  | -24.130736 |
|        | H    | 3.080163   | -9.236467  | -22.915141 |
| H20 73 | O    | -16.598416 | -12.079831 | -3.027250  |
|        | H    | -16.867920 | -10.478507 | -2.230559  |
|        | H    | -17.759278 | -12.096643 | -4.414224  |
| H20 74 | O    | -7.269666  | 11.013178  | -13.834325 |
|        | H    | -8.505325  | 11.789160  | -12.765409 |
|        | H    | -5.999216  | 12.281927  | -14.052995 |
| H20 75 | O    | 14.926078  | 0.729892   | -0.880692  |
|        | H    | 14.684685  | 0.444233   | 0.888972   |
|        | H    | 13.432629  | 1.604655   | -1.406033  |
| H20 76 | O    | -10.249930 | -15.511937 | -12.567035 |
|        | H    | -10.815693 | -16.802050 | -11.432530 |
|        | H    | -8.811185  | -16.233598 | -13.392143 |
| H20 77 | O    | 6.153774   | -6.810349  | -18.378764 |
|        | H    | 5.668826   | -7.601311  | -16.826092 |
|        | H    | 7.802388   | -6.142320  | -18.051056 |
| H20 78 | O    | 3.767930   | -11.873194 | -12.000036 |
|        | H    | 5.530167   | -12.150411 | -12.298787 |
|        | H    | 3.520657   | -10.115534 | -12.347993 |
| H20 79 | O    | 4.238655   | 2.169696   | -16.376549 |
|        | H    | 3.035930   | 0.926934   | -16.906250 |
|        | H    | 5.028606   | 2.717325   | -17.908757 |
| H20 80 | O    | -14.682710 | 0.723814   | -16.713445 |
|        | H    | -15.146156 | -0.558170  | -17.902276 |
|        | H    | -16.240331 | 1.191942   | -15.922083 |

continued on following page

Table I: Structure of the water cluster used in the calculations.  
(continued)

| no.    | atom | $x$        | $y$        | $z$        |
|--------|------|------------|------------|------------|
| H20 81 | O    | -8.561719  | -1.140463  | -21.112374 |
|        | H    | -7.247272  | 0.101638   | -21.143972 |
|        | H    | -7.967236  | -2.456681  | -22.201292 |
| H20 82 | O    | 3.098039   | -19.304371 | -4.729504  |
|        | H    | 4.475918   | -18.539272 | -3.842004  |
|        | H    | 2.316059   | -17.936405 | -5.617626  |
| H20 83 | O    | -11.481971 | -2.627730  | 8.985770   |
|        | H    | -12.101806 | -1.963577  | 7.421708   |
|        | H    | -12.537150 | -4.058240  | 9.320165   |
| H20 84 | O    | -15.326832 | 4.993788   | 0.715203   |
|        | H    | -16.282312 | 3.624938   | 1.411545   |
|        | H    | -14.247077 | 5.525334   | 2.065452   |
| H20 85 | O    | 4.699246   | -3.093313  | -22.212181 |
|        | H    | 4.440050   | -3.027219  | -24.001044 |
|        | H    | 4.907824   | -4.853023  | -21.849556 |
| H20 86 | O    | 5.481254   | -14.871569 | -2.300088  |
|        | H    | 6.047926   | -15.537002 | -0.716527  |
|        | H    | 4.081237   | -13.810067 | -1.870262  |
| H20 87 | O    | 7.716927   | 7.491705   | -0.281469  |
|        | H    | 7.150103   | 7.474634   | 1.436088   |
|        | H    | 6.704471   | 6.239325   | -1.104914  |
| H20 88 | O    | -0.099717  | 10.178584  | -12.503376 |
|        | H    | 1.433197   | 10.526454  | -11.608532 |
|        | H    | -1.386487  | 10.226881  | -11.233150 |
| H20 89 | O    | 0.174031   | -13.358407 | -17.219676 |
|        | H    | -1.538844  | -13.329107 | -16.639346 |
|        | H    | 1.160370   | -13.516676 | -15.711807 |
| H20 90 | O    | -12.876200 | -6.358544  | 5.051406   |
|        | H    | -11.965607 | -7.839829  | 5.549600   |
|        | H    | -12.072332 | -5.826137  | 3.521071   |
| H20 91 | O    | 10.374968  | 3.013642   | -1.655659  |
|        | H    | 10.560607  | 4.591509   | -0.791103  |
|        | H    | 10.505729  | 3.439678   | -3.408650  |
| H20 92 | O    | -10.546723 | 11.487361  | -1.141891  |
|        | H    | -10.877949 | 9.851362   | -1.838584  |
|        | H    | -11.173553 | 12.643663  | -2.383515  |
| H20 93 | O    | 16.771883  | 5.466609   | -7.085057  |
|        | H    | 15.059461  | 5.871879   | -6.666781  |
|        | H    | 17.622371  | 5.393421   | -5.490410  |
| H20 94 | O    | 3.754576   | 11.312079  | -9.304066  |
|        | H    | 3.860035   | 12.752060  | -8.214609  |
|        | H    | 3.061607   | 10.005879  | -8.262327  |
| H20 95 | O    | -12.292259 | 3.567992   | 15.558774  |
|        | H    | -11.551327 | 2.039891   | 14.936268  |
|        | H    | -13.884710 | 3.052567   | 16.244353  |
| H20 96 | O    | -6.101086  | -22.917487 | -8.300376  |
|        | H    | -4.397045  | -23.519612 | -8.227759  |
|        | H    | -6.818520  | -23.760124 | -9.731051  |
| H20 97 | O    | -16.474111 | -10.067162 | -10.990268 |

continued on following page

Table I: Structure of the water cluster used in the calculations.  
(continued)

| no.     | atom | $x$        | $y$        | $z$        |
|---------|------|------------|------------|------------|
|         | H    | -16.578248 | -8.410626  | -11.709038 |
|         | H    | -14.818169 | -10.647783 | -11.428810 |
| H20 98  | O    | -19.797465 | -9.667636  | -6.291155  |
|         | H    | -19.300393 | -9.924126  | -8.011247  |
|         | H    | -20.691509 | -8.095379  | -6.307792  |
| H20 99  | O    | -5.173425  | -12.712808 | -15.395169 |
|         | H    | -6.298381  | -11.960539 | -16.595231 |
|         | H    | -5.886872  | -12.300065 | -13.785131 |
| H20 100 | O    | -0.985868  | 2.698559   | -21.389839 |
|         | H    | -2.772036  | 2.967797   | -21.483095 |
|         | H    | -0.804981  | 1.203452   | -20.388080 |
| H20 101 | O    | -6.036941  | 3.692122   | -20.942100 |
|         | H    | -6.140711  | 5.167311   | -21.983556 |
|         | H    | -5.389533  | 4.295973   | -19.364820 |
| H20 102 | O    | 8.569219   | -3.794649  | 6.339855   |
|         | H    | 9.506348   | -2.259850  | 6.534192   |
|         | H    | 9.732419   | -5.097931  | 6.808897   |
| H20 103 | O    | 1.629116   | 13.174149  | -1.603484  |
|         | H    | 2.665934   | 13.034467  | -0.127990  |
|         | H    | 2.665646   | 14.042581  | -2.804738  |
| H20 104 | O    | -1.793830  | 17.039669  | -2.196744  |
|         | H    | -0.532014  | 15.757285  | -2.009931  |
|         | H    | -1.427261  | 17.806463  | -3.793377  |
| H20 105 | O    | -7.668774  | -18.374941 | -6.401296  |
|         | H    | -8.484260  | -18.612928 | -4.804446  |
|         | H    | -7.099663  | -20.026682 | -6.869747  |
| H20 106 | O    | 10.403971  | -3.097182  | -22.166270 |
|         | H    | 8.729735   | -2.493265  | -21.844084 |
|         | H    | 11.118126  | -1.873647  | -23.290782 |
| H20 107 | O    | -15.303927 | 1.380876   | 7.300949   |
|         | H    | -14.621806 | 2.684838   | 8.352603   |
|         | H    | -16.432204 | 0.470603   | 8.382603   |
| H20 108 | O    | 8.586125   | -8.600562  | -9.057275  |
|         | H    | 8.704894   | -9.813191  | -10.394065 |
|         | H    | 8.628559   | -9.589696  | -7.543539  |
| H20 109 | O    | 16.039129  | 1.515730   | -10.242663 |
|         | H    | 15.156300  | 2.196577   | -11.666967 |
|         | H    | 16.442450  | 2.957886   | -9.228217  |
| H20 110 | O    | -15.024905 | 4.616965   | -7.229413  |
|         | H    | -13.962813 | 5.310923   | -8.518586  |
|         | H    | -14.288548 | 3.008246   | -6.853399  |
| H20 111 | O    | -3.380516  | -15.912024 | -1.000610  |
|         | H    | -4.224096  | -15.041860 | -2.343283  |
|         | H    | -1.903827  | -16.614472 | -1.773616  |
| H20 112 | O    | -15.260480 | 6.494595   | -20.095316 |
|         | H    | -13.528983 | 6.244390   | -19.636073 |
|         | H    | -15.477693 | 5.509412   | -21.596587 |
| H20 113 | O    | -18.039071 | -8.431035  | 0.810660   |
|         | H    | -19.833632 | -8.649203  | 0.751210   |

continued on following page



Table I: Structure of the water cluster used in the calculations.  
(continued)

| no.     | atom | $x$        | $y$        | $z$        |
|---------|------|------------|------------|------------|
|         | H    | -17.604252 | -8.725105  | 2.541566   |
| H20 114 | O    | -1.661337  | -24.854339 | -7.595623  |
|         | H    | -0.939126  | -26.256071 | -6.709540  |
|         | H    | -2.163790  | -25.538535 | -9.192807  |
| H20 115 | O    | -13.114116 | 4.624061   | 10.656335  |
|         | H    | -12.770748 | 4.110898   | 12.356437  |
|         | H    | -11.486048 | 4.717060   | 9.873819   |
| H20 116 | O    | -12.415589 | 11.848047  | -6.994473  |
|         | H    | -11.301689 | 10.449792  | -6.719341  |
|         | H    | -12.471242 | 12.035666  | -8.792606  |
| H20 117 | O    | -6.990293  | 15.098132  | -9.148407  |
|         | H    | -8.451163  | 15.701720  | -10.027681 |
|         | H    | -7.148884  | 15.784283  | -7.482385  |
| H20 118 | O    | -12.346254 | 10.561505  | -12.238735 |
|         | H    | -11.449595 | 8.995109   | -12.357032 |
|         | H    | -12.498223 | 11.126656  | -13.950194 |
| H20 119 | O    | 11.408034  | -1.036518  | -9.303117  |
|         | H    | 13.124194  | -0.467289  | -9.351673  |
|         | H    | 11.316250  | -2.308130  | -10.586145 |
| H20 120 | O    | -5.118967  | -0.122532  | 11.023945  |
|         | H    | -3.926824  | 1.229469   | 10.874032  |
|         | H    | -4.376584  | -1.485876  | 10.095644  |
| H20 121 | O    | -9.994751  | -0.336500  | 13.264888  |
|         | H    | -8.344874  | 0.245731   | 12.806086  |
|         | H    | -10.596101 | -1.198962  | 11.793113  |
| H20 122 | O    | -2.302168  | 10.694993  | 2.997228   |
|         | H    | -1.936063  | 10.018308  | 1.360264   |
|         | H    | -4.049229  | 11.156282  | 2.916163   |
| H20 123 | O    | 13.022958  | -5.274418  | 1.238475   |
|         | H    | 14.310326  | -4.634833  | 0.140659   |
|         | H    | 13.911509  | -5.785673  | 2.728668   |
| H20 124 | O    | 7.566591   | 6.942112   | -9.525069  |
|         | H    | 8.221679   | 5.879240   | -10.833788 |
|         | H    | 6.672251   | 8.244973   | -10.405006 |
| H20 125 | O    | -2.177550  | 7.035558   | 6.401299   |
|         | H    | -2.965508  | 5.658517   | 5.532698   |
|         | H    | -2.216268  | 8.400625   | 5.215265   |
| H20 126 | O    | 9.007883   | 12.608974  | -5.620298  |
|         | H    | 10.262452  | 11.860688  | -4.553663  |
|         | H    | 7.974532   | 11.220878  | -6.146567  |
| H20 127 | O    | -1.447855  | -3.724807  | -24.991095 |
|         | H    | 0.236826   | -4.371453  | -25.114711 |
|         | H    | -1.920641  | -4.018898  | -23.270174 |
| H20 128 | O    | -7.648252  | 12.615523  | 3.065177   |
|         | H    | -7.811671  | 14.380621  | 3.424765   |
|         | H    | -8.836893  | 12.312229  | 1.735993   |
